# Supplementary material
Source: publisher figshare collection journal article supplement (https://tandf.figshare.com/articles/dataset/_/9822719)
Supplement: Supplementary file 1 [file 1]

A

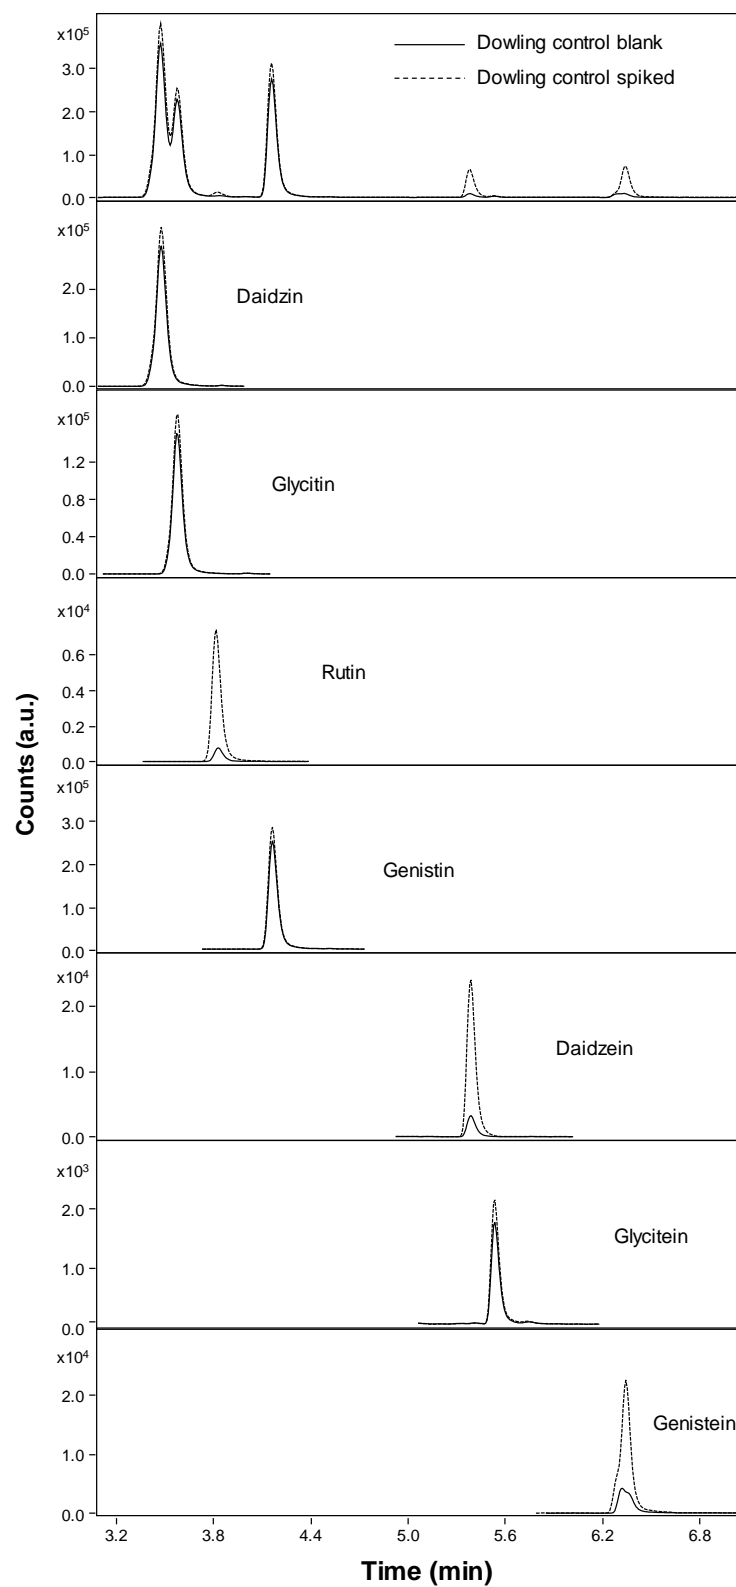

A. TIC of Dowling soybean extract spiked with standards of flavonoids and isoflavonoids to confirm the chemical identification on LC-MS.

B

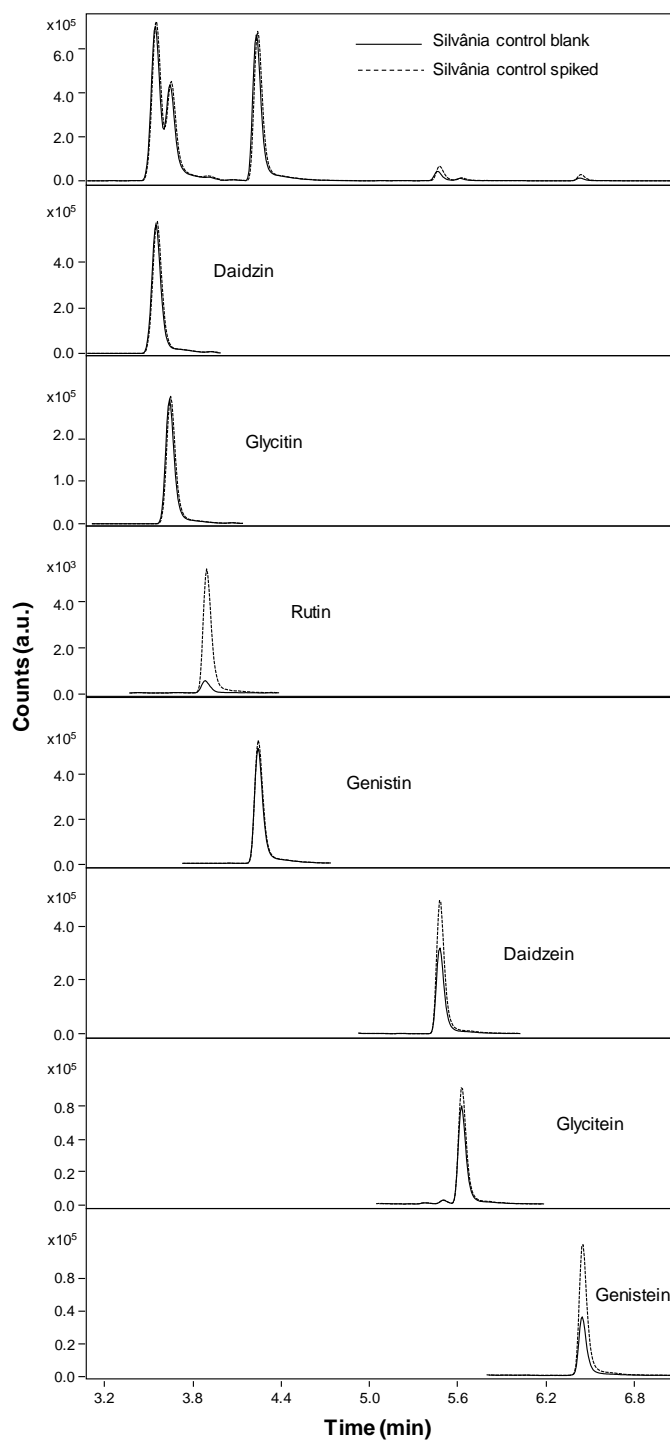

B. TIC of Dowling soybean extract spiked with standards of flavonoids and isoflavonoids to confirm the chemical identification on LC-MS.
